# Supplementary material for: Transcriptional responses to chronic oxidative stress require cholinergic activation of G-protein-coupled receptor signaling
Source: eLife. 2026 Jun 8;14:RP107726. doi: 10.7554/eLife.107726 (PMC13246005; doi:10.7554/eLife.107726)
Supplement: Figure 1—figure supplement 1—source data 1. [file elife-107726-fig1-figsupp1-data1.xlsx]

## Sheet: Fig S1
Fig S1 B
Kaplan-Meier raw data								Kaplan-Meier plotted raw data
%PQ-	[N=112]			%PQ+	[N=136]			Time (days)	PQ-	PQ+
#days	dead	censored		#days	dead	censored		0	100	100
0	0	0		0	0	0		1	100	100
1	0	1		1	0	3		2	100	98.4962
2	0	0		2	2	25		3	99.0991	98.4962
3	1	3		3	0	1		4	99.0991	98.4962
4	0	0		4	0	3		5	99.0991	96.5649
5	0	2		5	2	2		6	99.0991	87.6967
6	0	0		6	9	0		7	99.0991	75.8725
7	0	12		7	12	4		8	99.0991	41.5739
8	0	0		8	33	0		9	98.0335	28.0624
9	1	1		9	13	0		10	93.7244	18.7083
10	4	1		10	9	0		11	88.2753	12.4722
11	5	0		11	6	0		12	80.6465	8.31479
12	7	0		12	4	0		13	76.2873	2.0787
13	4	0		13	6	0		14	59.94	0
14	15	0		14	2	0		15	50.1316
15	9	0						16	47.952
16	2	0						17	37.0538
17	10	0						18	31.6047
18	5	0						19	26.1556
19	5	0						20	19.6167
20	6	0						21	19.6167
21	0	0						22	4.35927
22	14	0						23	4.35927
23	0	0						24	4.35927
24	0	0						25	1.08982
25	3	0						26	1.08982
26	0	0						27	0
27	1	0
Fig S1 C	IP50 data			Kaplan-Meier raw data								Kaplan-Meier plotted data
	PQ+	PQ+NAC+		%PQ+	[N=172]			%PQ+NAC	[N=175]			Time (days)	PQ+	PQ+NAC+
	6.1	9.8		#days	dead	censored		#days	dead	censored		0	100	100
	7.7	9.5		0	0	0		0	0	0		1	100	100
	6	8.1		1	0	5		1	0	10		2	100	100
	7.1	9.3		2	0	25		2	0	20		3	96.4789	99.3103
	8.8	9.3		3	5	4		3	1	11		4	92.1264	99.3103
	7.6	9.8		4	6	0		4	0	9		5	89.9502	98.5095
	7.7	10.2		5	3	0		5	1	0		6	75.4421	93.7041
				6	20	0		6	6	1		7	59.4832	88.8574
				7	22	1		7	6	1		8	32.3119	75.8141
				8	37	0		8	16	1		9	16.1559	58.5087
				9	22	0		9	21	1		10	5.14053	28.4185
				10	15	0		10	36	0		11	5.14053	18.3884
				11	0	0		11	12	0		12	2.93744	10.0301
				12	3	0		12	10	0		13	2.93744	0.835838
				13	0	0		13	11	0		14	1.46872	0
				14	2	0		14	1	0		15	0.734361
				15	1	0						16	0.734361
				16	0	0						17	0
				17	1	0
Fig S1D
	IP50 data					Kaplan-Meier raw data													Kaplan-Meier plotted data
	WT(N2)	sod-2(ok1030)	sod-2(gk257)			%WT	[N=123]			%sod-2(ok1030)	[N=91]			%sod-2(gk257)	[N=90]				Time (days) in paraquat	WT (N2)	sod-2(ok1030)	sod-2(gk257)																			Total No. of animals (all trials cumulative)				Fisher Exact test P value at 50%
	7.3	4.6	4.6			#days	dead	censored		#days	dead	censored		#days	dead	censored			0	100	100	100																			WT [N=123] v.s. ok1030 [N=91]				1.1e-12
	9.5	4.5	2.6			0	0	0		0	0	0		0	0	0			1	100	100	100																			WT [N=123] v.s. gk257 [N=90]				4.5e-13
	7.3	2.5	3.2			1	0	0		1	0	5		1	0	6			2	94.3089	96.5116	97.619
	7.6	5.2	3.3			2	7	7		2	3	10		2	2	4			3	92.5785	80.6467	58.8217
	7.9					3	2	3		3	12	0		3	31	0			4	91.6883	80.6467	25.0305
						4	1	1		4	0	0		4	27	0			5	91.6883	17.187	1.25153
						5	0	0		5	48	0		5	19	0			6	80.9015	3.96623	0
						6	12	0		6	10	0		6	1	0			7	67.4179	1.32208
						7	15	3		7	2	0							8	42.1362	0
						8	27	0		8	1	0							9	27.1544
						9	16	0											10	20.5999
						10	7	0											11	16.8545
						11	4	0											12	16.8545
						12	0	0											13	11.2363
						13	6	0											14	2.80908
						14	9	0											15	1.87272
						15	1	0											16	0
						16	2	0
Fig S1 E
	IP50 data
	PQ-	PQ+
	0.815292	4.23965
	3.07623	4.99639
	0.630962	5.04214
	2.44647	3.24023
	2.41045	3.66034
	1.96188	5.64525
	0.923374	1.02441
	1.71247	1.32385
	2.85288	1.50294
	1.31403	1.33584
