# Supplementary material for: Transcriptional responses to chronic oxidative stress require cholinergic activation of G-protein-coupled receptor signaling
Source: eLife. 2026 Jun 8;14:RP107726. doi: 10.7554/eLife.107726 (PMC13246005; doi:10.7554/eLife.107726)
Supplement: Figure 1—figure supplement 2—source data 1. [file elife-107726-fig1-figsupp2-data1.xlsx]

## Sheet: Fig S2
Fig S2A
	IP50 data				Kaplan-Meier raw data									Kaplan-Meier plotted data
	Histamine(-);PQ(-)	Histamine (+);PQ(-)			%His-PQ-	[N=46]			%His+PQ-	[N=49]				Time (days)	Histamine(-);PQ(-)	Histamine(+);PQ(-)
	16.3	16.5			#days	dead	censored		#days	dead	censored			0	100	100
	15	14.8			0	0	0		0	0	0			1	100	100
	15	10.9			1	0	0		1	0	0			2	100	100
	16.6	9.7			2	0	0		2	0	0			3	100	100
					3	0	2		3	0	0			4	100	97.9592
					4	0	0		4	1	0			5	100	95.9184
					5	0	0		5	1	0			6	100	95.9184
					6	0	1		6	0	0			7	100	95.9184
					7	0	0		7	0	0			8	97.6744	95.9184
					8	1	0		8	0	1			9	93.0233	83.4073
					9	2	0		9	6	2			10	90.6977	72.4326
					10	1	0		10	5	0			11	81.3953	63.6529
					11	4	1		11	4	0			12	79.0014	54.8732
					12	1	0		12	4	1			13	76.6074	38.8685
					13	1	0		13	7	0			14	71.8194	38.8685
					14	2	0		14	0	0			15	55.0616	29.723
					15	7	0		15	4	0			16	52.6676	27.4366
					16	1	0		16	1	0			17	40.6977	11.4319
					17	5	0		17	7	0			18	31.1218	11.4319
					18	4	0		18	0	0			19	21.5458	4.57277
					19	4	0		19	3	0			20	11.9699	4.57277
					20	4	0		20	0	0			21	4.78796	0
					21	3	0		21	2	0			22	0
					22	2	0
Fig S2B
	IP50 data				Kaplan-Meier raw data									Kaplan-Meier plotted data
	Histamine(-);PQ(-)	Histamine(+);PQ(-)			%His-PQ-	[N=68]			%His+PQ-	[N=67]				Time (days)	Histamine(-);PQ(-)	Histamine(+);PQ(-)
	15.1	18			#days	dead	censored		#days	dead	censored			0	100	100
	14.3	12.7			0	0	0		0	0	0			1	100	94.0299
	16.25	16.4			1	0	1		1	4	3			2	100	90.8955
	17.5	16.4			2	0	1		2	2	2			3	100	90.8955
	18.35	14.5			3	0	0		3	0	0			4	100	90.8955
	15.6	13			4	0	0		4	0	0			5	100	90.8955
					5	0	0		5	0	0			6	100	90.8955
					6	0	0		6	0	0			7	98.4848	90.8955
					7	1	2		7	0	0			8	98.4848	90.8955
					8	0	0		8	0	0			9	96.9216	90.8955
					9	1	1		9	0	0			10	93.7438	90.8955
					10	2	0		10	0	0			11	92.155	90.8955
					11	1	0		11	0	0			12	90.5661	90.8955
					12	1	4		12	0	0			13	85.4397	77.9104
					13	3	2		13	8	1			14	76.5397	67.9644
					14	5	0		14	6	2			15	67.6398	41.8243
					15	5	0		15	15	0			16	55.1798	36.5962
					16	7	0		16	3	0			17	32.0399	12.1987
					17	13	0		17	14	0			18	24.9199	8.71339
					18	4	0		18	2	0			19	8.89997	3.48536
					19	9	0		19	3	0			20	3.55999	0
					20	3	0		20	2	0			21	1.77999
					21	1	0							22	1.77999
					22	0	0							23	1.77999
					23	0	0							24	0
					24	1	0
