# Supplementary material for: Transcriptional responses to chronic oxidative stress require cholinergic activation of G-protein-coupled receptor signaling
Source: eLife. 2026 Jun 8;14:RP107726. doi: 10.7554/eLife.107726 (PMC13246005; doi:10.7554/eLife.107726)
Supplement: Figure 1—source data 1. [file elife-107726-fig1-data1.xlsx]

## Sheet: Fig 1
Fig 1 A
	IP50 data			Kaplan-Meier raw data								Kaplan-Meier plotted data
	Histamine(-);PQ(+)	Histamine (+);PQ(+)		%His+PQ+	[N=64]			%His-PQ+	[N=59]			Time (days)in paraquat	Histamine(+);PQ (+)	Histamine(-);PQ (+)
	7.8	5.8		#days	dead	censored		#days	dead	censored		0	100	100
	8.6	5.6		0	0	0		0	0	0		1	100	100
	5.8	4.6		1	0	0		1	0	0		2	100	100
	5.5	4.6		2	0	0		2	0	0		3	100	100
	8.8	5.8		3	0	1		3	0	1		4	85.7143	96.5517
	8.9	5.4		4	9	1		4	2	2		5	54.9865	85.8238
				5	19	0		5	6	1		6	25.876	76.6936
				6	18	0		6	5	1		7	21.0243	63.5995
				7	3	0		7	7	1		8	11.3208	48.1815
				8	6	0		8	8	1		9	4.85175	32.121
				9	4	0		9	8	0		10	4.85175	28.1059
				10	0	0		10	2	0		11	1.61725	14.0529
				11	2	0		11	7	0		12	1.61725	6.02268
				12	0	0		12	4	0		13	1.61725	2.00756
				13	0	0		13	2	0		14	1.61725	2.00756
				14	0	0		14	0	0		15	1.61725	0
				15	0	0		15	1	0		16	1.61725
				16	0	0						17	0
				17	1	0
Fig 1B
	IP50 data			Kaplan-Meier raw data								Kaplan-Meier plotted data
	Histamine(-);PQ(+)	Histamine(+);PQ(+)		%His-PQ+	[N=82]							Time (days) in paraquat	Histamine(-);PQ(+)	Histamine(+);PQ(+)							Total No. of animals (all trials cumulative)
	8.5	6.8		#days	dead	censored		%His+PQ+	[N=89]			0	100	100							His(-);PQ(+) N= 82
	13	11		0	0	0		#days	dead	censored		1	100	97.7528							His (+);PQ(-) N= 89
	9.6	6.6		1	0	0		0	0	0		2	100	97.7528
	9.3	4.2		2	0	4		1	2	3		3	98.7179	97.7528							Fisher Exact test P value at 50%
	14.1	7.1		3	1	1		2	0	2		4	96.1201	92.3221							1.2e-07
	9.9	6.1		4	2	0		3	0	10		5	96.1201	84.176
				5	0	2		4	4	0		6	93.4501	58.4952
				6	2	0		5	6	3		7	86.7751	35.6678
				7	5	0		6	18	0		8	76.0951	22.8274
				8	8	1		7	16	0		9	70.6597	21.4007
				9	4	1		8	9	0		10	56.8049	15.6938
				10	10	0		9	1	0		11	48.492	12.8404
				11	6	0		10	4	0		12	34.6371	5.70685
				12	10	0		11	2	0		13	24.9387	2.85343
				13	7	0		12	5	0		14	19.3968	2.85343
				14	4	0		13	2	0		15	11.0839	0
				15	6	0		14	0	0		16	4.15645
				16	5	0		15	2	0		17	2.77097
				17	1	0						18	2.77097
				18	0	0						19	0
				19	2	0
