# Supplementary material for: Transcriptional responses to chronic oxidative stress require cholinergic activation of G-protein-coupled receptor signaling
Source: eLife. 2026 Jun 8;14:RP107726. doi: 10.7554/eLife.107726 (PMC13246005; doi:10.7554/eLife.107726)
Supplement: Figure 2—source data 1. [file elife-107726-fig2-data1.xlsx]

## Sheet: Fig 2
Fig 2A
	IP50 data									Kaplan-Meier raw data																													Kaplan-Meier plotted data
	WT(N2)	eat-4(ky5)	unc-17(e245)	unc-25(e156)	tdc-1(n3420)	tph-1(mg280)	cat-2(n4547)			%N2	[N=527]			%ky5	[N=251]			%e245	[N=155]			%e156	[N= 148]			%n3420	[N= 155 ]			%mg280	[N= 205 ]			%n4547	[N= 145 ]				Time (days) in PQ	WT(N2)	eat-4(ky5)	unc-17(e245)	unc-25(e156)	tdc-1(n3420)	tph-1(mg280)	cat-2(n4547)
	8	4.2	4	8.2	7.8	9	9.2			#days	dead	censored		#days	dead	censored		#days	dead	censored		#days	dead	censored		#days	dead	censored		#days	dead	censored		#days	dead	censored			0	100	100	100	100	100	100	100
	7.5	4.4	4	8.2	10.8	14	8			0	0	0		0	0	0		0	0	0		0	0	0		0	0	0		0	0	0		0	0	0			1	100	100	100	100	100	100	100
	7	6.5	5	6.5	11.2	8.4	7			1	0	5		1	0	41		1	0	0		1	0	0		1	0	0		1	0	0		1	0	0			2	100	99.0476	99.3548	100	100	100	99.3103
	9	4	4.6	7	11.2	9.5	12.4			2	0	90		2	2	124		2	1	3		2	0	16		2	0	9		2	0	56		2	1	13			3	100	94.3311	98.6969	92.4242	100	100	99.3103
	8	4.8	5.5	10.2	9.2	13.8	13			3	0	12		3	4	2		3	1	0		3	10	0		3	0	14		3	0	0		3	0	0			4	100	71.353	96.0649	86.3636	100	95.9732	99.3103
	11	5.5	6.2			13				4	0	32		4	19	2		4	4	4		4	8	0		4	0	2		4	6	6		4	0	3			5	99.4845	41.3096	67.6514	81.8182	100	94.5721	96.2069
	10.5	3.8				10				5	2	25		5	24	2		5	42	0		5	6	9		5	0	10		5	2	5		5	4	0			6	98.3822	19.9885	28.4136	74.3802	100	93.8446	91.5517
	10	3.5								6	4	12		6	16	0		6	58	0		6	9	0		6	0	4		6	1	7		6	6	2			7	94.6751	9.32798	5.41211	52.8926	98.2759	91.537	78.1347
	14	3.2								7	13	11		7	8	0		7	34	0		7	26	0		7	2	3		7	3	3		7	17	1			8	86.7117	3.9977	0.676514	40.4959	78.7978	85.2241	63.7834
	13	3.7								8	27	1		8	4	0		8	7	0		8	15	0		8	22	0		8	8	0		8	18	0			9	82.8645	0	0	25.6198	73.4856	70.2309	57.4051
	13									9	13	0		9	3	0		9	1	0		9	18	0		9	6	4		9	19	1		9	8	1			10	73.0983			18.1818	39.9985	54.2694	37.192
	13									10	33	8										10	9	0		10	36	0		10	20	0		10	25	1			11	63.3111			9.09091	31.6267	47.8847	31.4066
	12									11	32	0										11	11	0		11	9	1		11	8	1		11	7	0			12	55.9707			7.43802	14.3758	38.9571	29.7536
	11.5									12	24	0										12	2	0		12	18	0		12	11	0		12	2	0			13	44.96			1.65289	4.79192	25.1598	20.6622
	11									13	36	1										13	7	0		13	10	0		13	17	0		13	11	0			14	32.9502			0.826446	1.91677	17.0437	10.7444
	11.5									14	39	0										14	1	0		14	3	0		14	10	2		14	12	1			15	21.8641			0	0.958385	11.6615	5.37218
	16.2									15	36	0										15	1	0		15	1	0		15	6	0		15	6	0			16	18.4767				0.958385	9.86742	4.47682
	13									16	11	0														16	0	0		16	2	0		16	1	0			17	8.00658				0	4.48519	0
	12									17	34	0														17	1	0		17	6	0		17	5	0			18	7.08275					4.48519
	12.8									18	3	0																		18	0	0							19	4.00329					2.69111
	11.5									19	10	0																		19	2	0							20	2.15562					0
	12									20	6	0																		20	3	0							21	0
	11.4									21	7	0
	9.5
	12.8
	12.6
	12.8
	16.2
	12
	13.4
	12.4
	14
	14
	13.4
	13
	11.9
Fig 2B					Kaplan-Meier raw data													Kaplan-Meier plotted data
	IP50 data				%N2	[N=65]			%ky5	[N=67]			%unc-17(e245)	[N=80]				Time (days)	WT(N2)	eat-4(ky5)	unc-17(e245)																			Total No. of animals (all trials cumulative)				Fisher Exact test P value at 50%
	WT(N2)	eat-4(ky5)	unc-17(e245)		#days	dead	censored		#days	dead	censored		#days	dead	censored			0	100	100	100																			N2 [N=65] v.s. ky5 [N=67]				0.2425
	19.8	19.3	18.3		0	0	0		0	0	0		0	0	0			1	100	100	100																			N2 [N=65] v.s. e245 [N=80]				0.0012
	19.7	15	14.4		1	0	0		1	0	11		1	0	0			2	100	100	100
	15.4	20.3	17.4		2	0	0		2	0	4		2	0	4			3	96.9231	100	100
		17.2			3	2	3		3	0	4		3	0	0			4	96.9231	97.9167	100
					4	0	0		4	1	4		4	0	0			5	96.9231	97.9167	98.6842
					5	0	2		5	0	5		5	1	0			6	96.9231	97.9167	98.6842
					6	0	0		6	0	3		6	0	1			7	96.9231	97.9167	98.6842
					7	0	11		7	0	1		7	0	5			8	96.9231	97.9167	98.6842
					8	0	0		8	0	0		8	0	2			9	96.9231	97.9167	98.6842
					9	0	0		9	0	2		9	0	0			10	88.6743	97.9167	94.2655
					10	4	1		10	0	0		10	3	0			11	88.6743	97.9167	91.3197
					11	0	1		11	0	0		11	2	0			12	88.6743	97.9167	83.9552
					12	0	0		12	0	1		12	5	0			13	73.5348	91.5995	70.6991
					13	7	0		13	2	0		13	9	0			14	73.5348	78.9651	69.2262
					14	0	2		14	4	0		14	1	1			15	73.5348	69.4892	61.7016
					15	0	0		15	3	0		15	5	0			16	66.6409	60.0134	57.1869
					16	3	0		16	3	2		16	3	0			17	66.6409	60.0134	46.6525
					17	0	0		17	0	0		17	7	0			18	66.6409	56.4832	39.1279
					18	0	0		18	1	1		18	5	0			19	55.1511	52.7177	27.0885
					19	5	0		19	1	0		19	8	0			20	39.0654	45.1866	13.5443
					20	7	0		20	2	2		20	9	0			21	36.7674	27.112	12.0393
					21	1	0		21	4	1		21	1	0			22	9.19185	21.6896	12.0393
					22	12	0		22	1	0		22	0	0			23	9.19185	10.8448	0
					23	0	0		23	2	0		23	8	0			24	9.19185	5.42239
					24	0	0		24	1	0							25	2.29796	5.42239
					25	3	0		25	0	0							26	2.29796	0
					26	0	0		26	1	0							27	0
					27	1	0
