# Supplementary material for: Transcriptional responses to chronic oxidative stress require cholinergic activation of G-protein-coupled receptor signaling
Source: eLife. 2026 Jun 8;14:RP107726. doi: 10.7554/eLife.107726 (PMC13246005; doi:10.7554/eLife.107726)
Supplement: Figure 3—source data 1. [file elife-107726-fig3-data1.xlsx]

## Sheet: Fig 3
Fig 3A
	IP50 data
	WT(N2)	unc-17(e245)	unc-17(e113)	unc-17β RNAi
	7.5	4	6.2	7.2
	6.5	4	4.2	6.8
	8	5	4.5	7.7
	9	4.6	6.3	8.4
	8	5.5	5.8
	10.5	6.2	5.8
	13	5.5	5.6
	12
	13.8
	13.4
	14
	11.9
Fig 3B
	IP50 data
	WT(N2)	unc-17(e245)	unc-17(e113)
	19.8	18.3	10
	19.7	14.4	12
	15.4	17.4	15
			16.5
			18.7
