# Supplementary material for: Transcriptional responses to chronic oxidative stress require cholinergic activation of G-protein-coupled receptor signaling
Source: eLife. 2026 Jun 8;14:RP107726. doi: 10.7554/eLife.107726 (PMC13246005; doi:10.7554/eLife.107726)
Supplement: Figure 7—source data 1. [file elife-107726-fig7-data1.xlsx]

## Sheet: Fig 7
Fig 7B
IP50 data
WT(N2)	gar-3(gk305)	ric-3(hm9)
8	5	5.6
7.5	5.2	5.2
7	5.5	8.2
9	5.2	7
8	5.2	11.6
11	6.4	13.3
10.5	5.6	9.4
10	8	12.2
14	6.5	12.2
13	6.2
13	6.8
13	8
12	7
11.5	8.2
11	8
11.5	7
16.2	6
13	7.2
12	7.8
12.8	7.5
11.5	7.2
12	7
11.4	6.5
9.5	7.2
12.8	6.5
12.6	6.8
12.8	6.9
16.2
12
11.2
5.6
9.7
6.8
7.7
10
10.6
13.4
13.4
12.4
Fig 7C
IP50 data
WT(N2)	gar-3(gk305)	gar-3(gk305);ric-3(hm9)
9	6.5	6.7
10	6.8	7.5
12.5	6.9	7.2
13.4		6.6
Fig 7D
IP50 data
WT(N2)	gar-3(gk305)
19.8	19.7
19.7	20.1
15.4	17
Fig 7E
IP50 data
WT(N2)	unc-17(e245)	gar-3(gk305)
5.5	4	5.2
6.5	4	4.5
8	5	4.8
9	4.6	5
8	5.5	5.2
11	6.2	5.5
10.5	5.5	6.4
12.5	5.5	5.6
11.4		6.5
		6.8
		7.1
Fig 7F
IP50 data
WT(N2)	unc-17(e245)	unc-17(e113)	gar-3(gk305)	gar-3(gk305);unc-17(e245)	gar-3(gk305);unc-17(e113)	gar-2(ok520);gar-3(gk305)
9	5.5	6.3	6.4	5	7.9	6.6
8	6.2	5.8	5.6	5.9	6	7
10.5	5.5	6	8	5.8	5.7	5.4
13			6.5		5.9	5.2
16.2			7.2			5.2
12			7.1			7.1
11.4
Fig 7G
IP50 data
WT(N2)	gar-3(gk305)	gar-3p::gar-3(+);gar-3(gk305)
12.8	7.2	14.8
12.8	7	15
12.6	6.5	12.5
16.2	7.2	11.2
12		11.6
