# Supplementary material for: Transcriptional responses to chronic oxidative stress require cholinergic activation of G-protein-coupled receptor signaling
Source: eLife. 2026 Jun 8;14:RP107726. doi: 10.7554/eLife.107726 (PMC13246005; doi:10.7554/eLife.107726)
Supplement: Figure 8—figure supplement 1—source data 1. [file elife-107726-fig8-figsupp1-data1.xlsx]

## Sheet: Sheet1
Fig S3D
IP50 data
WT(N2)	gar-3(gk305)	myo-3p::gar-3(+);gar-3(gk305)	unc-17βp::gar-3(+);gar-3(gk305)
8	5	5.5	7
7.5	5	5.5	5.5
10	5.5	5.4	6
7	6	5.7	6
7	5.5		5.7
9.5	5
	5
	6
