# Supplementary material for: Transcriptional responses to chronic oxidative stress require cholinergic activation of G-protein-coupled receptor signaling
Source: eLife. 2026 Jun 8;14:RP107726. doi: 10.7554/eLife.107726 (PMC13246005; doi:10.7554/eLife.107726)
Supplement: Figure 8—source data 1. [file elife-107726-fig8-data1.xlsx]

## Sheet: Fig 8
Fig 8F
Kaplan -Meier raw data													Kaplan -Meier plotted data
%WT	[N=105]			%gar-3(gk305)	[N=97]			%unc-17βp::gar-3(+);gk305	[N=96]				Time (days) in PQ	WT(N2)	gar-3(gk305)	unc-17βp::gar-3(+);gk305
#days	dead	censored		#days	dead	censored		#days	dead	censored			0	100	100	100
0	0	0		0	0	0		0	0	0			1	100	100	100
1	0	2		1	0	0		1	0	1			2	100	100	100
2	0	4		2	0	0		2	0	1			3	99	100	100
3	1	0		3	0	1		3	0	0			4	99	99	98
4	0	0		4	1	0		4	2	1			5	95	72	87
5	4	0		5	26	0		5	10	0			6	84	23	44
6	11	0		6	47	0		6	40	0			7	64	5	31
7	20	2		7	17	0		7	12	0			8	43	2	19
8	20	0		8	3	0		8	11	0			9	31	2	17
9	11	0		9	0	0		9	2	0			10	26	1	16
10	5	0		10	1	0		10	1	0			11	15	0	12
11	10	0		11	1	0		11	3	0			12	11		10
12	4	0		12	0	0		12	3	0			13	7		6
13	4	0		13	0	0		13	3	0			14	5		3
14	2	0		14	0	0		14	3	0			15	3		1
15	2	0		15	0	0		15	2	0			16	1		1
16	2	0		16	0	0		16	0	0			17	1		0
17	0	0		17	0	0		17	1	0			18	0
18	1	0		18	0	0		18	0	0
Fig 8G
Kaplan -Meier raw data													Kaplan -Meier plotted data
%WT	[N=45]			%gar-3(gk305)	[N=48]			%myo-3p::gar-3(+);gk305	[N=75]				Time (days) in PQ	WT	gar-3(gk305)	myo-3p::gar-3(+);gk305
#days	dead	censored		#days	dead	censored		#days	dead	censored			0	100	100	100
0	0	0		0	0	0		0	0	0			1	100	97.9167	100
1	0	2		1	1	0		1	0	0			2	100	97.9167	100
2	0	4		2	0	0		2	0	0			3	100	95.8333	100
3	0	0		3	1	0		3	0	2			4	100	93.75	100
4	0	0		4	1	0		4	0	0			5	97.4359	50	71.2329
5	1	0		5	21	0		5	21	0			6	87.1795	0	27.3973
6	4	0		6	24	0		6	32	0			7	66.6667		6.84931
7	8	0						7	15	0			8	43.5897		2.73973
8	9	0						8	3	0			9	38.4615		1.36986
9	2	0						9	1	0			10	25.641		1.36986
10	5	0						10	0	0			11	15.3846		1.36986
11	4	0						11	0	0			12	12.8205		0
12	1	0						12	1	0			13	5.12821
13	3	0											14	0
14	2	0
