# Supplementary material for: Transcriptional responses to chronic oxidative stress require cholinergic activation of G-protein-coupled receptor signaling
Source: eLife. 2026 Jun 8;14:RP107726. doi: 10.7554/eLife.107726 (PMC13246005; doi:10.7554/eLife.107726)
Supplement: Figure 9—figure supplement 1—source data 1. [file elife-107726-fig9-figsupp1-data1.xlsx]

## Sheet: Sheet1
Fig S4A fluorescence		Fig S4B RT-qPCR
PQ-	PQ+	PQ-	PQ+
128018	132640	1	118.727
122177	133474	0.544	170.264
121205	229200	6.796	107.722
111898	155527
128164	141355	1	124.063
122443	162377	0.251	12.114
155913	166720	0.298	47.946
117715	101540
73594	139728	1	92.149
73594	221524	0.977	38.188
91490	126635
80420	116747
74647	121732
74647	102856
80737	67395
76859	112529
163646	87068
75932	104990
77580	77426
120648	92120
52125	109446
93102	77906
70314
66920
110786
77039
105945
92646
