# Supplementary material for: Transcriptional responses to chronic oxidative stress require cholinergic activation of G-protein-coupled receptor signaling
Source: eLife. 2026 Jun 8;14:RP107726. doi: 10.7554/eLife.107726 (PMC13246005; doi:10.7554/eLife.107726)
Supplement: Figure 9—source data 1. [file elife-107726-fig9-data1.xlsx]

## Sheet: Sheet1
Fig 9E
IP50 data
WT(N2)	unc-17(e113)	unc-17βp::gar-3 OE	unc-17βp::gar-3 (+);unc-17
8	6.2	14.5	6.1
13	6.3	18	7.8
12	5.8	15	6.8
13.8	5.8	13.3
11.9	5.6	13.6
11.4	6	13.5
10	7.3	16.2
11.2		16
12.3		14.3
9.8		14.4
12.5
8.5
8.4
11
8.9
9.8
11.7
10.8
11
