# Supplementary figures and images for: Transcriptional responses to chronic oxidative stress require cholinergic activation of G-protein-coupled receptor signaling
Source: eLife journal article supplement (doi:10.7554/elife.107726), 2025-08-26

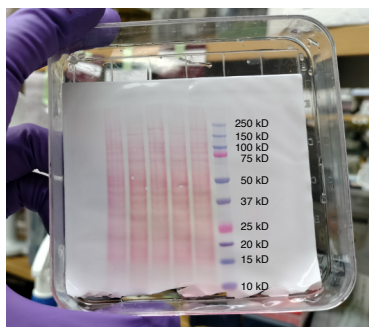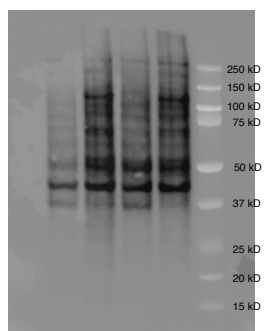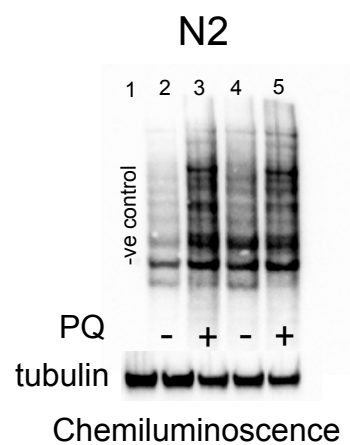

Supplement: fig1-figsupp1-data2 [file labeledN2_PQ and control_48 hr.pdf › figure 1 supplement 1 source data 3/labeledN2_PQ and control_48 hr.pdf]

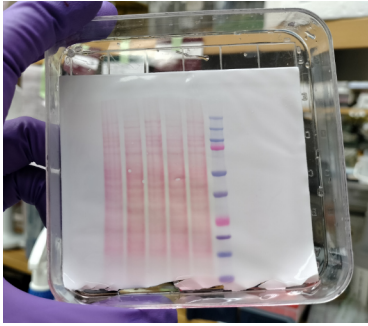

Ponceau S staining

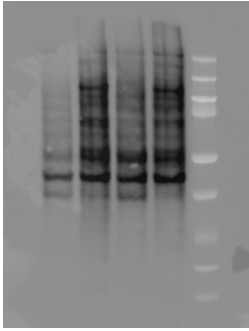

Chemiluminescence+colorimetry

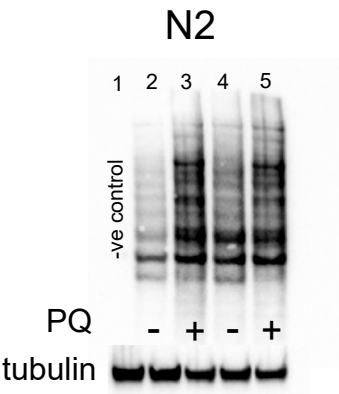

Chemiluminescence

Supplement: fig1-figsupp1-data3 [file labeledN2_PQ and control_48 hr.pdf › figure 1 supplement 1 source data 3/labeledN2_PQ and control_48 hr.pdf]
